# Supplementary material for: Context-dependent variability in blue whale acoustic behaviour
Source: R Soc Open Sci. 2018 Aug 8;5(8):180241. doi: 10.1098/rsos.180241 (PMC6124089; doi:10.1098/rsos.180241)
Supplement: Blue whale call detections and determinations data [file rsos180241supp3.xlsx]

## Sheet: DataDescription
Context-dependent variability in blue whale acoustic behaviour
Lewis et al. 2018 Royal Society Open Science
Call Determinations: Description of Data
This workbook contains a log of occurrence of all blue whale calls used in the analysis.
This workbook contains 42 tabs, each listing calls detected from an individual deployment.
Tab names denote start date and time of the deployment (format: MM-DD-YY_HHmm).
Within each tab, data columns are as follows:
Call Type: specifies which call was detected (values: A NE Pacific, B NE Pacific, D)
Call start time: logged start time of the call (format: M/DD/YY HH:mm:ss.s)
Call end time: logged end time of the call (format: M/DD/YY HH:mm:ss.s)
RMS: root-mean-square received level of the detected call (unit: dB relative), for details on calculation see Methods Section 2.2. of the paper
SNR: signal-to-noise ratio of the detected call (unit: dB relative), for details on calculation see Methods Section 2.2 of the paper
Depth: depth measured from pressure sensor at time of call start (unit: m); note that negative means below the surface
Caller Determination: label determination of whether the call is thought to be produced by the tagged whale ('tagged whale') or not ('not tagged whale'), for details on determination process see Methods Section 2.2 of the paper

## Sheet: 6-27-02_1049
Call Type	Call start time	Call end time	RMS	SNR	Depth	Caller determination
D	2002-06-27 10:55:20	2002-06-27 10:55:23	100.262	7.17541	-4.39	tagged whale
D	2002-06-27 11:06:30	2002-06-27 11:06:34	98.1146	12.0871	-2.71	tagged whale

## Sheet: 6-30-02_1549
Call Type	Call start time	Call end time	RMS	SNR	Depth	Caller Determination
B NE Pacific	2002-06-30 16:31:54	2002-06-30 16:32:10	92.975	17.37	-20.14	tagged whale
A NE Pacific	2002-06-30 17:16:02	2002-06-30 17:16:18	83.9489	7.27577	-20.7	tagged whale
A NE Pacific	2002-06-30 18:37:52	2002-06-30 18:38:09	83.5939	7.95984	-26.3	tagged whale
A NE Pacific	2002-06-30 19:02:08	2002-06-30 19:02:24	84.1989	5.70814	-21.82	tagged whale
A NE Pacific	2002-06-30 19:55:30	2002-06-30 19:55:46	84.5556	12.2631	-21.82	tagged whale
A NE Pacific	2002-06-30 20:24:49	2002-06-30 20:25:03	83.1303	6.16257	-21.26	tagged whale
A NE Pacific	2002-06-30 20:51:00	2002-06-30 20:51:19	82.4586	6.91903	-23.5	tagged whale
A NE Pacific	2002-06-30 21:03:19	2002-06-30 21:03:35	82.8653	3.96397	-17.34	not tagged whale
A NE Pacific	2002-06-30 21:08:54	2002-06-30 21:09:15	81.9659	4.81959	-20.7	not tagged whale
B NE Pacific	2002-06-30 21:09:42	2002-06-30 21:09:59	92.6875	7.11272	-16.78	not tagged whale
A NE Pacific	2002-06-30 21:32:26	2002-06-30 21:32:46	80.3925	5.7227	-16.22	tagged whale
A NE Pacific	2002-06-30 21:48:50	2002-06-30 21:49:10	79.9664	7.97242	-22.94	tagged whale
A NE Pacific	2002-06-30 22:25:20	2002-06-30 22:25:41	77.9068	14.6264	-15.1	not tagged whale
A NE Pacific	2002-06-30 22:58:41	2002-06-30 22:59:00	81.1391	22.1992	-22.38	tagged whale
A NE Pacific	2002-06-30 23:44:55	2002-06-30 23:45:17	79.6181	19.3588	-13.42	not tagged whale
B NE Pacific	2002-06-30 23:45:44	2002-06-30 23:46:01	92.991	19.2094	-12.86	tagged whale
A NE Pacific	2002-07-01 00:14:30	2002-07-01 00:14:52	79.7068	27.6964	-13.98	tagged whale
B NE Pacific	2002-07-01 00:15:19	2002-07-01 00:15:36	92.6474	29.6123	-13.42	tagged whale
A NE Pacific	2002-07-01 00:56:28	2002-07-01 00:56:49	79.7947	24.1267	-15.66	tagged whale
B NE Pacific	2002-07-01 00:57:16	2002-07-01 00:57:34	94.661	24.039	-14.54	tagged whale
A NE Pacific	2002-07-01 01:07:33	2002-07-01 01:07:54	79.5513	27.6068	-23.5	not tagged whale
B NE Pacific	2002-07-01 01:08:23	2002-07-01 01:08:40	89.5054	26.6693	-20.14	not tagged whale
A NE Pacific	2002-07-01 01:39:24	2002-07-01 01:39:44	80.2044	12.8455	-24.06	tagged whale
A NE Pacific	2002-07-01 02:14:04	2002-07-01 02:14:24	82.6873	14.9245	-20.7	tagged whale
A NE Pacific	2002-07-01 02:40:30	2002-07-01 02:40:51	81.7565	24.325	-11.74	tagged whale
A NE Pacific	2002-07-01 03:04:58	2002-07-01 03:05:21	81.7634	14.4461	-21.82	tagged whale
B NE Pacific	2002-07-01 03:05:49	2002-07-01 03:06:07	95.7404	17.1048	-17.9	tagged whale
A NE Pacific	2002-07-01 03:11:00	2002-07-01 03:11:22	79.6547	14.6939	-15.1	tagged whale
B NE Pacific	2002-07-01 03:11:50	2002-07-01 03:12:08	92.4653	16.3836	-12.86	tagged whale
A NE Pacific	2002-07-01 03:38:08	2002-07-01 03:38:29	81.5281	3.99307	-19.58	not tagged whale
A NE Pacific	2002-07-01 04:06:51	2002-07-01 04:07:10	80.2558	10.9301	-22.38	tagged whale
A NE Pacific	2002-07-01 04:20:09	2002-07-01 04:20:31	79.0672	14.9048	-20.7	not tagged whale
B NE Pacific	2002-07-01 04:20:59	2002-07-01 04:21:17	92.3493	43.4807	-16.78	tagged whale
B NE Pacific	2002-07-01 04:28:33	2002-07-01 04:28:51	90.4462	11.7711	-15.66	not tagged whale
A NE Pacific	2002-07-01 04:35:14	2002-07-01 04:35:32	82.8849	15.2741	-20.14	tagged whale
B NE Pacific	2002-07-01 04:36:04	2002-07-01 04:36:21	93.2816	23.9222	-16.78	tagged whale
A NE Pacific	2002-07-01 04:52:41	2002-07-01 04:53:04	82.0693	5.11758	-21.82	not tagged whale
B NE Pacific	2002-07-01 04:53:31	2002-07-01 04:53:50	91.0123	10.4991	-17.9	tagged whale
B NE Pacific	2002-07-01 06:58:21	2002-07-01 06:58:39	90.0874	6.38287	-17.9	not tagged whale

## Sheet: 8-24-06_1530
Call Type	Call start time	Call end time	RMS	SNR	Depth	Caller Determination
A NE Pacific	2006-08-24 15:35:05	2006-08-24 15:35:23	89.422	12.2647	-13.61	tagged whale
B NE Pacific	2006-08-24 15:35:55	2006-08-24 15:36:08	99.0153	19.2683	-13.16	tagged whale
A NE Pacific	2006-08-24 15:48:02	2006-08-24 15:48:20	86.6691	10.2194	-17.04	tagged whale
B NE Pacific	2006-08-24 15:48:52	2006-08-24 15:49:03	98.874	19.9241	-16.99	tagged whale
A NE Pacific	2006-08-24 15:51:15	2006-08-24 15:51:33	88.1531	11.0158	-23.32	tagged whale
B NE Pacific	2006-08-24 15:52:06	2006-08-24 15:52:25	96.0889	17.3447	-21.47	tagged whale
A NE Pacific	2006-08-24 15:53:14	2006-08-24 15:53:31	82.2255	5.05002	-30.68	not tagged whale
B NE Pacific	2006-08-24 15:54:04	2006-08-24 15:54:21	94.1619	25.3619	-28.78	not tagged whale
A NE Pacific	2006-08-24 16:04:23	2006-08-24 16:04:41	87.2136	8.92011	-23.26	tagged whale
B NE Pacific	2006-08-24 16:05:14	2006-08-24 16:05:32	94.9089	12.8967	-27.25	not tagged whale
A NE Pacific	2006-08-24 16:55:21	2006-08-24 16:55:40	86.4217	20.4666	-21.91	tagged whale
B NE Pacific	2006-08-24 16:56:11	2006-08-24 16:56:26	98.3289	30.9255	-20.74	tagged whale
A NE Pacific	2006-08-24 16:58:48	2006-08-24 16:59:06	86.1907	7.03797	-24.98	tagged whale
B NE Pacific	2006-08-24 16:59:38	2006-08-24 16:59:57	96.1574	14.472	-21.36	not tagged whale
A NE Pacific	2006-08-24 17:39:54	2006-08-24 17:40:12	86.7877	8.50625	-20.32	tagged whale
B NE Pacific	2006-08-24 17:40:43	2006-08-24 17:41:00	97.0558	22.1393	-18.97	tagged whale
A NE Pacific	2006-08-24 17:43:08	2006-08-24 17:43:25	89.9452	43.4079	-16.6	tagged whale
B NE Pacific	2006-08-24 17:43:57	2006-08-24 17:44:12	98.8099	21.7318	-15.97	tagged whale
A NE Pacific	2006-08-24 17:52:45	2006-08-24 17:53:02	84.8327	6.82946	-21.18	not tagged whale
B NE Pacific	2006-08-24 17:53:32	2006-08-24 17:53:49	97.1017	21.0845	-19.62	tagged whale
A NE Pacific	2006-08-24 17:56:04	2006-08-24 17:56:22	87.5031	12.2556	-20.66	tagged whale
B NE Pacific	2006-08-24 17:56:54	2006-08-24 17:57:14	95.9321	38.6158	-22.74	tagged whale
A NE Pacific	2006-08-24 17:58:05	2006-08-24 17:58:25	87.469	26.6478	-23.81	tagged whale
B NE Pacific	2006-08-24 17:58:55	2006-08-24 17:59:12	95.4545	21.5559	-20.74	tagged whale
A NE Pacific	2006-08-24 18:00:42	2006-08-24 18:01:00	85.9656	16.1416	-21.29	tagged whale
B NE Pacific	2006-08-24 18:01:31	2006-08-24 18:01:53	95.3594	29.9954	-21.18	not tagged whale
A NE Pacific	2006-08-24 18:02:40	2006-08-24 18:02:56	87.4703	31.4719	-24.02	tagged whale
B NE Pacific	2006-08-24 18:03:27	2006-08-24 18:03:41	97.3126	31.4104	-18.84	tagged whale
A NE Pacific	2006-08-24 18:05:26	2006-08-24 18:05:44	86.7453	10.7082	-20.19	tagged whale
B NE Pacific	2006-08-24 18:06:16	2006-08-24 18:06:33	98.0056	23.9407	-22.07	tagged whale
A NE Pacific	2006-08-24 18:07:28	2006-08-24 18:07:46	86.2154	43.0571	-19.98	tagged whale
B NE Pacific	2006-08-24 18:08:16	2006-08-24 18:08:33	97.5313	27.5382	-18.11	tagged whale
A NE Pacific	2006-08-24 18:09:58	2006-08-24 18:10:17	84.5581	30.9987	-18.37	not tagged whale
B NE Pacific	2006-08-24 18:10:47	2006-08-24 18:11:07	95.8792	19.8492	-23.89	tagged whale
A NE Pacific	2006-08-24 18:27:15	2006-08-24 18:27:34	84.644	10.4159	-20.3	not tagged whale
B NE Pacific	2006-08-24 18:28:04	2006-08-24 18:28:21	97.5103	20.0479	-17.59	tagged whale
A NE Pacific	2006-08-24 18:30:11	2006-08-24 18:30:30	86.6129	20.86	-21.81	tagged whale
B NE Pacific	2006-08-24 18:31:01	2006-08-24 18:31:17	95.5767	29.6904	-21.02	tagged whale
A NE Pacific	2006-08-24 18:32:14	2006-08-24 18:32:32	86.6594	20.2415	-18.14	tagged whale
B NE Pacific	2006-08-24 18:33:03	2006-08-24 18:33:21	96.5025	25.5591	-20.45	tagged whale
A NE Pacific	2006-08-24 18:41:18	2006-08-24 18:41:36	85.9874	5.25602	-19.46	not tagged whale
B NE Pacific	2006-08-24 18:42:08	2006-08-24 18:42:24	97.1876	19.4236	-19.15	tagged whale
A NE Pacific	2006-08-24 18:44:44	2006-08-24 18:45:03	88.4396	35.7333	-15.17	tagged whale
B NE Pacific	2006-08-24 18:45:34	2006-08-24 18:45:54	95.6552	17.0275	-19.93	not tagged whale
A NE Pacific	2006-08-24 18:46:51	2006-08-24 18:47:10	87.2463	11.826	-19.54	tagged whale
B NE Pacific	2006-08-24 18:47:41	2006-08-24 18:47:54	97.4497	22.0215	-16.57	tagged whale

## Sheet: 9-06-07_1001
Call Type	Call start time	Call end time	RMS	SNR	Depth	Caller Determination
A NE Pacific	2007-09-06 10:31:02	2007-09-06 10:31:17	74.9056	0.501519	-10.13	not tagged whale
D	2007-09-06 10:32:46	2007-09-06 10:32:48	84.721	12.6645	-19.19	tagged whale
A NE Pacific	2007-09-06 10:32:51	2007-09-06 10:33:02	68.3948	4.87426	-18.44	tagged whale
A NE Pacific	2007-09-06 10:42:23	2007-09-06 10:42:38	74.1715	17.0273	-13.96	tagged whale
A NE Pacific	2007-09-06 13:25:25	2007-09-06 13:25:37	64.3314	10.5338	-230.23	not tagged whale
A NE Pacific	2007-09-06 13:28:15	2007-09-06 13:28:29	63.2891	27.2597	-238.43	not tagged whale

## Sheet: 9-06-07_1024
Call Type	Call start time	Call end time	RMS	SNR	Depth	Caller Determination
A NE Pacific	2007-09-06 10:31:04	2007-09-06 10:31:17	69.8608	-4.57462	-2.45	not tagged whale
D	2007-09-06 10:32:49	2007-09-06 10:32:51	86.0087	12.9818	-16.87	tagged whale
A NE Pacific	2007-09-06 10:32:54	2007-09-06 10:33:05	73.9035	29.1633	-13.85	tagged whale
A NE Pacific	2007-09-06 10:40:03	2007-09-06 10:40:21	80.2777	15.1475	-25	tagged whale
A NE Pacific	2007-09-06 10:42:32	2007-09-06 10:42:42	70.0211	28.4433	-1.79	tagged whale

## Sheet: 9-06-07_1603
Call Type	Call start time	Call end time	RMS	SNR	Depth	Caller Determination
A NE Pacific	2007-09-06 16:42:48	2007-09-06 16:43:02	70.699	2.43464	-20.51	not tagged whale
A NE Pacific	2007-09-06 16:47:05	2007-09-06 16:47:22	55.3026	9.63844	-163.44	not tagged whale
B NE Pacific	2007-09-06 16:48:01	2007-09-06 16:48:15	65.2657	25.8722	-146.99	not tagged whale
A NE Pacific	2007-09-06 16:52:34	2007-09-06 16:52:50	55.4201	9.27274	-223.93	not tagged whale
A NE Pacific	2007-09-06 17:06:51	2007-09-06 17:07:05	73.4458	12.1084	-20.75	tagged whale
A NE Pacific	2007-09-06 17:17:41	2007-09-06 17:17:54	71.1237	9.84909	-20.01	tagged whale
D	2007-09-06 17:22:12	2007-09-06 17:22:15	67.7353	6.30317	-166.23	not tagged whale
A NE Pacific	2007-09-06 17:29:43	2007-09-06 17:29:57	76.6034	0.7341	-18.7	not tagged whale
B NE Pacific	2007-09-06 17:30:23	2007-09-06 17:30:40	89.2244	18.1105	-14.7	tagged whale
A NE Pacific	2007-09-06 18:05:17	2007-09-06 18:05:30	72.6605	10.9671	-20.88	tagged whale
A NE Pacific	2007-09-06 18:09:27	2007-09-06 18:09:41	51.0089	8.0585	-188.5	not tagged whale
D	2007-09-06 18:12:03	2007-09-06 18:12:07	65.0019	8.22117	-160.94	not tagged whale
A NE Pacific	2007-09-06 18:36:21	2007-09-06 18:36:34	48.1493	3.92067	-142.68	not tagged whale
A NE Pacific	2007-09-06 18:53:02	2007-09-06 18:53:12	72.046	8.68802	-17.32	tagged whale
A NE Pacific	2007-09-06 19:47:48	2007-09-06 19:48:02	75.8469	23.5834	-16.48	tagged whale
D	2007-09-06 19:50:41	2007-09-06 19:50:45	73.6177	27.206	-15.21	tagged whale
D	2007-09-06 19:51:05	2007-09-06 19:51:08	81.1151	9.811	-8.38	tagged whale
D	2007-09-06 19:55:25	2007-09-06 19:55:27	63.3478	7.25774	-19.42	tagged whale
D	2007-09-06 19:55:34	2007-09-06 19:55:37	69.854	14.1745	-17.83	tagged whale
D	2007-09-06 19:56:26	2007-09-06 19:56:28	75.5413	10.5865	-18.44	tagged whale
A NE Pacific	2007-09-06 19:56:35	2007-09-06 19:56:57	77.4449	33.2267	-15.84	tagged whale
B NE Pacific	2007-09-06 19:57:25	2007-09-06 19:57:43	92.2928	25.9215	-14.21	tagged whale
A NE Pacific	2007-09-06 20:08:06	2007-09-06 20:08:26	71.9618	9.83617	-14.6	tagged whale
B NE Pacific	2007-09-06 20:08:54	2007-09-06 20:09:11	83.6327	49.4288	-10.16	tagged whale
A NE Pacific	2007-09-06 20:12:35	2007-09-06 20:12:57	75.6495	22.0183	-16.93	tagged whale
B NE Pacific	2007-09-06 20:13:25	2007-09-06 20:13:43	93.3497	44.4579	-14.34	tagged whale
D	2007-09-06 20:14:35	2007-09-06 20:14:39	66.8207	16.1505	-16.36	tagged whale
A NE Pacific	2007-09-06 20:14:50	2007-09-06 20:15:11	77.1602	33.2373	-15.02	tagged whale
B NE Pacific	2007-09-06 20:15:39	2007-09-06 20:15:57	94.8131	55.9596	-10.55	tagged whale
A NE Pacific	2007-09-06 20:18:44	2007-09-06 20:19:05	75.2042	28.7602	-17.71	tagged whale
A NE Pacific	2007-09-06 20:25:49	2007-09-06 20:26:05	73.6375	16.051	-17.75	tagged whale
A NE Pacific	2007-09-06 20:35:26	2007-09-06 20:35:39	51.193	-1.68847	-15.75	not tagged whale
B NE Pacific	2007-09-06 20:36:10	2007-09-06 20:36:23	60.134	8.72206	-15.02	not tagged whale
A NE Pacific	2007-09-06 20:37:32	2007-09-06 20:37:48	50.0894	11.3914	-14.85	not tagged whale
B NE Pacific	2007-09-06 20:38:23	2007-09-06 20:38:36	59.7644	7.20659	-16.54	not tagged whale
B NE Pacific	2007-09-06 20:41:41	2007-09-06 20:41:53	60.2318	25.9504	-14.33	tagged whale
A NE Pacific	2007-09-06 20:48:28	2007-09-06 20:48:43	46.8025	4.0905	-16.2	not tagged whale
B NE Pacific	2007-09-06 20:49:17	2007-09-06 20:49:30	56.0942	7.85149	-12.71	not tagged whale
A NE Pacific	2007-09-06 20:50:14	2007-09-06 20:50:35	65.6422	17.0687	-13.63	tagged whale
B NE Pacific	2007-09-06 20:51:04	2007-09-06 20:51:22	89.2186	25.3623	-8.82	tagged whale
A NE Pacific	2007-09-06 20:54:02	2007-09-06 20:54:21	73.0472	16.9466	-16.57	tagged whale
A NE Pacific	2007-09-06 20:57:22	2007-09-06 20:57:45	71.5547	19.8764	-17.46	tagged whale
B NE Pacific	2007-09-06 20:58:11	2007-09-06 20:58:29	95.7575	31.7648	-11.11	tagged whale
A NE Pacific	2007-09-06 21:01:39	2007-09-06 21:01:58	67.7926	11.6859	-13.36	tagged whale
A NE Pacific	2007-09-06 21:04:43	2007-09-06 21:04:58	67.0393	11.147	-12.98	tagged whale
B NE Pacific	2007-09-06 21:17:37	2007-09-06 21:17:47	60.6463	11.0425	-13.21	not tagged whale
B NE Pacific	2007-09-06 21:35:51	2007-09-06 21:36:05	47.7581	12.9362	-10.1	not tagged whale
A NE Pacific	2007-09-06 21:40:14	2007-09-06 21:40:33	68.8513	26.2104	-15.42	tagged whale
B NE Pacific	2007-09-06 21:41:02	2007-09-06 21:41:20	96.2903	30.6053	-10.43	tagged whale
A NE Pacific	2007-09-06 21:45:59	2007-09-06 21:46:19	68.7151	14.8129	-11.77	tagged whale
B NE Pacific	2007-09-06 21:46:48	2007-09-06 21:47:05	97.169	30.2223	-11.05	tagged whale
D	2007-09-06 21:49:05	2007-09-06 21:49:07	64.9865	4.28378	-17.49	tagged whale
D	2007-09-06 21:49:14	2007-09-06 21:49:16	61.6913	12.2416	-17.93	not tagged whale
A NE Pacific	2007-09-06 21:50:20	2007-09-06 21:50:41	68.4368	25.8247	-15.21	tagged whale
B NE Pacific	2007-09-06 21:51:09	2007-09-06 21:51:27	96.206	42.0187	-10.99	tagged whale
A NE Pacific	2007-09-06 21:53:14	2007-09-06 21:53:28	51.3175	14.2257	-16.75	not tagged whale
B NE Pacific	2007-09-06 21:56:10	2007-09-06 21:56:21	54.6101	6.00921	-13.46	not tagged whale
A NE Pacific	2007-09-06 21:58:37	2007-09-06 21:58:48	65.1152	22.9563	-9.53	tagged whale
A NE Pacific	2007-09-06 22:01:11	2007-09-06 22:01:33	68.691	24.8175	-11.89	tagged whale
B NE Pacific	2007-09-06 22:02:01	2007-09-06 22:02:19	95.303	33.2695	-9.74	tagged whale
A NE Pacific	2007-09-06 22:04:46	2007-09-06 22:05:08	69.8718	27.2323	-12.41	tagged whale
B NE Pacific	2007-09-06 22:05:37	2007-09-06 22:05:55	97.5871	32.5614	-10.28	tagged whale
A NE Pacific	2007-09-06 22:08:00	2007-09-06 22:08:21	66.8919	19.9188	-14.37	tagged whale
A NE Pacific	2007-09-06 22:09:34	2007-09-06 22:09:55	68.3886	10.7365	-13.86	tagged whale
B NE Pacific	2007-09-06 22:10:24	2007-09-06 22:10:41	97.3769	42.9028	-10.11	tagged whale
A NE Pacific	2007-09-06 22:14:10	2007-09-06 22:14:29	75.4702	22.7839	-19.43	tagged whale
A NE Pacific	2007-09-06 22:16:22	2007-09-06 22:16:42	70.1902	23.2904	-15.2	tagged whale
A NE Pacific	2007-09-06 22:20:51	2007-09-06 22:21:12	68.078	32.8657	-9.65	tagged whale
B NE Pacific	2007-09-06 22:21:41	2007-09-06 22:21:58	94.9869	33.027	-10.78	tagged whale
D	2007-09-06 22:25:14	2007-09-06 22:25:17	57.4819	3.73248	-10.08	not tagged whale
A NE Pacific	2007-09-06 22:28:51	2007-09-06 22:29:06	69.7508	20.1758	-13.43	tagged whale
A NE Pacific	2007-09-06 22:31:27	2007-09-06 22:31:44	48.549	14.0231	-13.78	not tagged whale
A NE Pacific	2007-09-06 22:54:19	2007-09-06 22:54:34	50.564	3.85103	-12.73	not tagged whale
B NE Pacific	2007-09-06 22:55:05	2007-09-06 22:55:17	60.4913	11.9704	-12.94	not tagged whale
A NE Pacific	2007-09-06 23:00:15	2007-09-06 23:00:29	47.6314	4.76429	-16.23	not tagged whale
A NE Pacific	2007-09-06 23:02:26	2007-09-06 23:02:46	71.7883	17.3838	-17.22	tagged whale
B NE Pacific	2007-09-06 23:03:13	2007-09-06 23:03:31	93.4747	36.4914	-10.75	tagged whale
A NE Pacific	2007-09-06 23:05:46	2007-09-06 23:06:08	70.7292	18.3437	-14.84	tagged whale
B NE Pacific	2007-09-06 23:06:37	2007-09-06 23:06:55	97.3532	37.3949	-12	tagged whale
D	2007-09-06 23:07:57	2007-09-06 23:07:59	71.2054	8.05856	-16.02	tagged whale
D	2007-09-06 23:08:20	2007-09-06 23:08:22	72.3453	5.46593	-13.78	tagged whale
D	2007-09-06 23:08:25	2007-09-06 23:08:28	71.9914	5.60614	-12.88	tagged whale
D	2007-09-06 23:08:29	2007-09-06 23:08:32	72.2874	4.70675	-13.9	tagged whale
D	2007-09-06 23:08:31	2007-09-06 23:08:33	69.5172	7.4752	-13.7	tagged whale
D	2007-09-06 23:08:33	2007-09-06 23:08:35	69.059	1.53679	-12.73	not tagged whale
D	2007-09-06 23:10:16	2007-09-06 23:10:19	64.9816	3.45063	-13.49	tagged whale
B NE Pacific	2007-09-06 23:11:05	2007-09-06 23:11:13	51.5282	7.18177	-12.52	not tagged whale
B NE Pacific	2007-09-06 23:12:26	2007-09-06 23:12:36	49.5556	16.7006	-11.98	not tagged whale
A NE Pacific	2007-09-06 23:13:49	2007-09-06 23:13:59	69.3686	26.606	-8.5	tagged whale
A NE Pacific	2007-09-06 23:38:27	2007-09-06 23:38:47	73.4152	16.9093	-19.53	tagged whale
B NE Pacific	2007-09-06 23:39:14	2007-09-06 23:39:31	96.9639	28.6882	-12.59	tagged whale
A NE Pacific	2007-09-06 23:42:00	2007-09-06 23:42:20	69.9442	18.269	-14.42	tagged whale
B NE Pacific	2007-09-06 23:42:49	2007-09-06 23:43:07	96.7215	36.8477	-12.07	tagged whale
A NE Pacific	2007-09-06 23:45:24	2007-09-06 23:45:46	68.8799	42.9704	-13.37	tagged whale
B NE Pacific	2007-09-06 23:46:14	2007-09-06 23:46:31	91.5284	40.8901	-11.29	tagged whale
A NE Pacific	2007-09-06 23:49:47	2007-09-06 23:50:09	74.9053	23.5178	-17.19	tagged whale
B NE Pacific	2007-09-06 23:50:36	2007-09-06 23:50:55	96.9924	39.8099	-12.3	tagged whale
A NE Pacific	2007-09-07 00:00:21	2007-09-07 00:00:30	71.0554	14.5623	-17.43	tagged whale
A NE Pacific	2007-09-07 00:12:57	2007-09-07 00:13:19	68.8475	14.6837	-15.38	tagged whale
B NE Pacific	2007-09-07 00:14:00	2007-09-07 00:14:05	90.1988	24.0353	-11.28	tagged whale
A NE Pacific	2007-09-07 00:35:46	2007-09-07 00:36:03	45.6347	11.7166	-10.35	not tagged whale
B NE Pacific	2007-09-07 00:36:45	2007-09-07 00:36:58	49.3677	12.3494	-9.63	not tagged whale
B NE Pacific	2007-09-07 00:40:24	2007-09-07 00:40:33	51.8039	5.47552	-7.64	not tagged whale
A NE Pacific	2007-09-07 00:47:25	2007-09-07 00:47:41	46.1799	6.02662	-17.07	not tagged whale
B NE Pacific	2007-09-07 00:48:14	2007-09-07 00:48:31	56.2072	9.49406	-14.82	not tagged whale
A NE Pacific	2007-09-07 00:58:37	2007-09-07 00:58:58	70.0144	24.3306	-13.64	tagged whale
B NE Pacific	2007-09-07 00:59:27	2007-09-07 00:59:45	95.3187	36.8561	-10.56	tagged whale
B NE Pacific	2007-09-07 01:02:57	2007-09-07 01:03:10	55.2973	6.39714	-9.57	not tagged whale
A NE Pacific	2007-09-07 01:15:50	2007-09-07 01:16:13	72.2627	55.9178	-14	tagged whale
B NE Pacific	2007-09-07 01:16:41	2007-09-07 01:16:59	95.1982	45.4981	-10.6	tagged whale
B NE Pacific	2007-09-07 01:19:15	2007-09-07 01:19:32	50.5218	5.84748	-13.69	not tagged whale
A NE Pacific	2007-09-07 01:20:50	2007-09-07 01:21:13	67.771	19.3375	-13.81	tagged whale
B NE Pacific	2007-09-07 01:21:40	2007-09-07 01:21:57	96.0946	54.518	-10.4	tagged whale
B NE Pacific	2007-09-07 01:26:45	2007-09-07 01:26:58	48.2625	5.35327	-9.83	not tagged whale
B NE Pacific	2007-09-07 01:34:23	2007-09-07 01:34:33	50.8422	21.828	-12.77	not tagged whale
A NE Pacific	2007-09-07 01:39:48	2007-09-07 01:40:10	71.5876	19.4549	-13.54	tagged whale
B NE Pacific	2007-09-07 01:40:38	2007-09-07 01:40:56	95.2747	48.1144	-12.04	tagged whale
B NE Pacific	2007-09-07 01:57:51	2007-09-07 01:58:00	51.8861	6.41068	-9.53	not tagged whale
B NE Pacific	2007-09-07 02:02:57	2007-09-07 02:03:10	54.2578	11.4253	-11.71	not tagged whale
A NE Pacific	2007-09-07 02:19:03	2007-09-07 02:19:20	71.4996	20.6387	-18.59	tagged whale
B NE Pacific	2007-09-07 02:27:33	2007-09-07 02:27:48	45.8559	10.9909	-15.65	not tagged whale
A NE Pacific	2007-09-07 02:28:54	2007-09-07 02:29:14	67.8819	21.6048	-15.03	tagged whale
B NE Pacific	2007-09-07 02:29:43	2007-09-07 02:30:00	95.7706	37.4847	-13.12	tagged whale
A NE Pacific	2007-09-07 02:37:27	2007-09-07 02:37:48	73.9475	23.6631	-16.53	tagged whale
B NE Pacific	2007-09-07 02:38:16	2007-09-07 02:38:34	96.4885	57.6083	-12.73	tagged whale
A NE Pacific	2007-09-07 02:40:38	2007-09-07 02:40:58	72.1587	21.5789	-15.29	tagged whale
B NE Pacific	2007-09-07 02:41:27	2007-09-07 02:41:45	95.9858	34.7367	-11.62	tagged whale
A NE Pacific	2007-09-07 02:44:29	2007-09-07 02:44:50	72.6213	17.1366	-17.47	tagged whale
B NE Pacific	2007-09-07 02:45:19	2007-09-07 02:45:37	95.5074	31.7779	-13.49	tagged whale
A NE Pacific	2007-09-07 02:48:57	2007-09-07 02:49:18	73.2628	20.5727	-16.65	tagged whale
B NE Pacific	2007-09-07 02:49:47	2007-09-07 02:50:05	96.5418	35.0067	-11.25	tagged whale
A NE Pacific	2007-09-07 03:00:22	2007-09-07 03:00:43	69.474	15.8254	-16.5	tagged whale
B NE Pacific	2007-09-07 03:01:11	2007-09-07 03:01:29	89.7407	29.9406	-12.12	tagged whale
A NE Pacific	2007-09-07 03:07:39	2007-09-07 03:07:58	71.6628	31.3243	-14.54	tagged whale
B NE Pacific	2007-09-07 03:08:28	2007-09-07 03:08:46	91.6488	27.9524	-12.06	tagged whale
A NE Pacific	2007-09-07 03:11:24	2007-09-07 03:11:46	72.3912	11.2846	-12.68	tagged whale
B NE Pacific	2007-09-07 03:12:14	2007-09-07 03:12:32	89.797	29.4737	-10.08	tagged whale
A NE Pacific	2007-09-07 03:15:08	2007-09-07 03:15:30	75.1711	17.5946	-15.91	tagged whale
B NE Pacific	2007-09-07 03:16:00	2007-09-07 03:16:17	95.976	31.3958	-14.78	tagged whale
A NE Pacific	2007-09-07 03:18:18	2007-09-07 03:18:39	74.7258	15.9119	-15.53	tagged whale
B NE Pacific	2007-09-07 03:19:08	2007-09-07 03:19:26	96.2583	31.1206	-12.25	tagged whale
A NE Pacific	2007-09-07 03:24:16	2007-09-07 03:24:34	73.7552	9.27141	-14.7	tagged whale

## Sheet: 9-06-07_1645
Call Type	Call start time	Call end time	RMS	SNR	Depth	Caller Determination
B NE Pacific	2007-09-06 16:48:03	2007-09-06 16:48:14	62.1273	4.33547	-128.93	not tagged whale

## Sheet: 9-08-07_0945
Call Type	Call start time	Call end time	RMS	SNR	Depth	Caller Determination
A NE Pacific	2007-09-08 09:51:14	2007-09-08 09:51:30	60.3596	15.4665	-179.88	not tagged whale
A NE Pacific	2007-09-08 10:50:19	2007-09-08 10:50:32	65.0571	6.59921	-177.2	not tagged whale
D	2007-09-08 11:02:21	2007-09-08 11:02:24	77.762	4.16312	-179.46	not tagged whale
D	2007-09-08 12:00:04	2007-09-08 12:00:08	81.4534	16.5264	-172.97	not tagged whale

## Sheet: 9-08-07_1002
Call Type	Call start time	Call end time	RMS	SNR	Depth	Caller Determination
A NE Pacific	2007-09-08 10:57:26	2007-09-08 10:57:38	74.4847	42.6704	-13.99	tagged whale

[truncated: 33 more sheets: 8-14-08_1432, 8-16-08_1044, 9-09-08_1338, 9-12-08_1430, 8-04-09_1403, 8-04-09_1725, 8-05-09_1045, 9-21-09_1610, 9-21-09_1630, 8-29-10_0927, 8-29-10_1022, 9-01-10_1559, 9-08-10_1320, 9-22-10_1047, 9-22-10_1554, 7-29-11_1229, 8-02-11_0902, 8-03-11_1239, 8-08-11_1059, 8-09-11_1346 …]
