# Supplementary material for: Context-dependent variability in blue whale acoustic behaviour
Source: R Soc Open Sci. 2018 Aug 8;5(8):180241. doi: 10.1098/rsos.180241 (PMC6124089; doi:10.1098/rsos.180241)
Supplement: Blue whale dive profile analyses [file rsos180241supp2.xlsx]

## Sheet: DataDescription
Context-dependent variability in blue whale acoustic behaviour
Lewis et al. 2018 Royal Society Open Science
Dive Profile Analyses: Description of Data
This workbook contains a log of all blue whale dives used in the analysis.
This workbook contains 121 tabs, each describing the dives recorded from an individual deployment.
Tab names denote start date and time of the deployment (format: MM-DD-YY_HHmm).
Within each tab, data columns are as follows:
Date: date at which the dive occurred within tag deployment (format: M/DD/YY)
Deploy Start Time: Start time of the deployment (HHmm)
Location: group classification of the initial location of tag deployment (values: In-S, In-C, In-N and Off), for details on location classification see Methods Section 2.4. of the paper
Dive Number: sequential number of the dive within an individual deployment
Start Time: start time of the dive in local time, defined as the start time of submergence from the surface (format: HH:mm:ss)
Tag Off?: specifies whether the tag fell off ('yes') or not ('no') during the dive; dives during which the tag fell off were excluded from analysis
Total Duration: duration of the dive, defined as the time between submergence from and reemergence to the surface (format: HH:mm:ss)
Bottom Time: time spent at the bottom of the dive, defined as the time between the whale's descent from and ascent to the surface and based on depth change over time (format: HH:mm:ss)
Max Depth: maximum depth reached during the dive (unit: m)
# Lunges: number of vertical lunges present within the dive, for details on lunges see Methods 2.3 and the Discussion sections of the paper
Dive Classification: broad classification of the dive into one of five behavioural categories (values: Shallow-noVL, ShallowLunging, Deep-noVL, DeepLunging, Surface Behaviour); for details on behavioural classifications see Methods Section 2.3. of the paper
TOD: time-of-day classification (values: dawn, day, dusk, night), for details on time-of-day classification see Methods Section 2.4. of the paper
Call Detected?: label determination of whether a call was detected during the dive ('Yes') or not ('No'), see supplementary workbook entitled 'Lewis-et-al-2018_CallDeterminations' for individual logs of calls detected for each deployment

## Sheet: 6-26-02_0903
Date	Deploy Start Time	Location	Dive #	Start Time	Tag Off?	Total Duration	Bottom Time	Max Depth	# Lunges	Dive Classification	TOD	Call Detected?
2002-06-26	903	In-N	1	09:03:06	No	00:07:52	00:04:41	-124.83	2	DeepLunging	Day	No
2002-06-26	903	In-N	2	09:12:47	No	00:07:36	00:04:33	-154.5	3	DeepLunging	Day	No
2002-06-26	903	In-N	3	09:22:27	No	00:06:54	00:04:03	-144.43	2	DeepLunging	Day	No
2002-06-26	903	In-N	4	09:30:49	No	00:06:31	00:03:36	-124.83	2	DeepLunging	Day	No
2002-06-26	903	In-N	5	09:38:44	No	00:07:44	00:04:52	-129.87	3	DeepLunging	Day	No
2002-06-26	903	In-N	6	09:47:58	No	00:07:11	00:04:32	-131.55	3	DeepLunging	Day	No
2002-06-26	903	In-N	7	09:56:56	No	00:06:08	00:03:16	-114.75	2	DeepLunging	Day	No
2002-06-26	903	In-N	8	10:04:15	No	00:05:49	00:03:16	-113.64	2	DeepLunging	Day	No
2002-06-26	903	In-N	9	10:11:28	No	00:07:05	00:04:02	-176.34	2	DeepLunging	Day	No
2002-06-26	903	In-N	10	10:20:01	No	00:07:09	00:03:45	-167.94	2	DeepLunging	Day	No
2002-06-26	903	In-N	11	10:28:53	No	00:07:06	00:04:24	-143.87	2	DeepLunging	Day	No
2002-06-26	903	In-N	12	10:37:44	No	00:07:14	00:04:28	-156.74	3	DeepLunging	Day	No
2002-06-26	903	In-N	13	10:46:30	No	00:06:24	00:03:15	-108.04	2	DeepLunging	Day	No
2002-06-26	903	In-N	14	10:54:16	No	00:07:07	00:04:31	-121.47	3	DeepLunging	Day	No
2002-06-26	903	In-N	15	11:02:51	No	00:05:49	00:03:22	-99.64	2	DeepLunging	Day	No
2002-06-26	903	In-N	16	11:09:45	No	00:05:52	00:03:11	-122.03	2	DeepLunging	Day	No
2002-06-26	903	In-N	17	11:17:09	No	00:05:47	00:03:05	-118.67	2	DeepLunging	Day	No
2002-06-26	903	In-N	18	11:24:06	No	00:05:45	00:02:37	-134.91	0	Deep-noVL	Day	No
2002-06-26	903	In-N	19	11:30:45	No	00:05:24	00:02:58	-107.48	3	DeepLunging	Day	No
2002-06-26	903	In-N	20	11:37:22	No	00:05:01	00:01:55	-101.32	1	DeepLunging	Day	No
2002-06-26	903	In-N	21	11:43:25	Yes	00:10:25	00:03:07	-123.71	2	DeepLunging	Day	No

## Sheet: 6-27-02_1049
Date	Deploy Start Time	Location	Dive #	Start Time	Tag Off?	Total Duration	Bottom Time	Max Depth	# Lunges	Dive Classification	TOD	Call Detected?
2002-06-27	1049	In-N	1	10:49:17	No	00:00:31	00:00:13	-11.18	0	Shallow-noVL	Day	No
2002-06-27	1049	In-N	2	10:55:01	No	00:00:35	00:00:11	-10.06	0	Shallow-noVL	Day	Yes
2002-06-27	1049	In-N	3	10:55:36	No	00:00:26	00:00:11	-10.62	0	Shallow-noVL	Day	No
2002-06-27	1049	In-N	4	10:50:05	No	00:05:00	00:02:50	-48.13	0	Shallow-noVL	Day	No
2002-06-27	1049	In-N	5	10:56:48	No	00:07:41	00:04:45	-141.63	3	DeepLunging	Day	No
2002-06-27	1049	In-N	6	11:06:16	No	00:00:28	00:00:10	-8.38	0	Shallow-noVL	Day	Yes
2002-06-27	1049	In-N	7	11:07:36	No	00:09:41	00:05:07	-165.7	3	DeepLunging	Day	No
2002-06-27	1049	In-N	8	11:21:04	No	00:08:40	00:04:56	-160.1	3	DeepLunging	Day	No
2002-06-27	1049	In-N	9	11:32:10	No	00:07:45	00:05:20	-132.67	3	DeepLunging	Day	No
2002-06-27	1049	In-N	10	11:42:10	No	00:09:15	00:05:50	-132.67	3	DeepLunging	Day	No
2002-06-27	1049	In-N	11	11:51:23	No	00:00:42	00:00:11	-15.1	0	Shallow-noVL	Day	No
2002-06-27	1049	In-N	12	11:54:21	No	00:08:04	00:05:27	-110.28	3	DeepLunging	Day	No
2002-06-27	1049	In-N	13	12:04:50	Yes	00:13:57	00:06:36	-125.39	4	DeepLunging	Day	No

## Sheet: 6-30-02_1549
Date	Deploy Start Time	Location	Dive #	Start Time	Tag Off?	Total Duration	Bottom Time	Max Depth	# Lunges	Dive Classification	TOD	Call Detected?
2002-06-30	1549	In-S	1	15:48:41	No	00:08:08	00:03:54	-105.8	0	Deep-noVL	Day	No
2002-06-30	1549	In-S	2	15:58:37	No	00:10:49	00:01:53	-190.89	0	Deep-noVL	Day	No
2002-06-30	1549	In-S	3	16:10:18	No	00:09:58	00:00:25	-129.31	0	Deep-noVL	Day	No
2002-06-30	1549	In-S	4	16:21:42	No	00:12:46	00:02:34	-193.69	1	DeepLunging	Day	Yes
2002-06-30	1549	In-S	5	16:35:16	No	00:11:33	00:05:02	-197.61	2	DeepLunging	Day	No
2002-06-30	1549	In-S	6	16:49:01	No	00:11:38	00:05:21	-208.25	2	DeepLunging	Day	No
2002-06-30	1549	In-S	7	17:01:33	No	00:15:08	00:06:29	-212.17	2	DeepLunging	Day	Yes
2002-06-30	1549	In-S	8	17:17:27	No	00:11:09	00:03:50	-203.77	0	Deep-noVL	Day	No
2002-06-30	1549	In-S	9	17:29:40	No	00:11:16	00:05:12	-193.69	3	DeepLunging	Day	No
2002-06-30	1549	In-S	10	17:42:04	No	00:08:05	00:03:22	-184.18	2	DeepLunging	Day	No
2002-06-30	1549	In-S	11	17:50:09	No	00:00:59	00:00:27	-25.18	0	Shallow-noVL	Day	No
2002-06-30	1549	In-S	12	17:51:14	No	00:07:44	00:02:39	-202.09	0	Deep-noVL	Day	No
2002-06-30	1549	In-S	13	18:00:37	No	00:12:08	00:04:43	-192.01	2	DeepLunging	Day	No
2002-06-30	1549	In-S	14	18:13:15	No	00:11:28	00:05:50	-196.49	3	DeepLunging	Day	No
2002-06-30	1549	In-S	15	18:26:22	No	00:12:51	00:05:42	-199.85	3	DeepLunging	Day	Yes
2002-06-30	1549	In-S	16	18:39:26	No	00:04:05	00:01:48	-76.69	1	DeepLunging	Day	No
2002-06-30	1549	In-S	17	18:44:39	No	00:18:17	00:15:08	-115.87	6	DeepLunging	Day	Yes
2002-06-30	1549	In-S	18	19:03:31	No	00:13:39	00:11:30	-116.99	5	DeepLunging	Night	No
2002-06-30	1549	In-S	19	19:17:45	No	00:05:59	00:01:58	-153.38	1	DeepLunging	Night	No
2002-06-30	1549	In-S	20	19:25:04	No	00:07:11	00:01:51	-162.34	1	DeepLunging	Night	No
2002-06-30	1549	In-S	21	19:33:02	No	00:08:32	00:03:47	-168.5	1	DeepLunging	Night	No
2002-06-30	1549	In-S	22	19:42:57	No	00:08:22	00:04:08	-122.03	1	DeepLunging	Night	No
2002-06-30	1549	In-S	23	19:51:21	No	00:04:46	00:01:34	-119.23	1	DeepLunging	Night	Yes
2002-06-30	1549	In-S	24	19:56:31	No	00:11:16	00:08:38	-131.55	3	DeepLunging	Night	No
2002-06-30	1549	In-S	25	20:08:52	No	00:05:53	00:03:44	-95.16	2	DeepLunging	Night	No
2002-06-30	1549	In-S	26	20:15:37	No	00:11:36	00:10:01	-77.81	5	DeepLunging	Night	Yes
2002-06-30	1549	In-S	27	20:27:53	No	00:02:55	00:01:26	-65.49	1	DeepLunging	Night	No
2002-06-30	1549	In-S	28	20:32:19	No	00:05:42	00:03:49	-73.89	2	DeepLunging	Night	No
2002-06-30	1549	In-S	29	20:39:17	No	00:08:14	00:06:39	-58.77	2	DeepLunging	Night	No
2002-06-30	1549	In-S	30	20:48:11	No	00:03:52	00:01:37	-55.41	1	DeepLunging	Night	Yes
2002-06-30	1549	In-S	31	20:53:18	No	00:10:55	00:07:52	-56.53	3	DeepLunging	Night	Yes
2002-06-30	1549	In-S	32	21:05:23	No	00:05:29	00:01:10	-63.25	0	Deep-noVL	Night	Yes
2002-06-30	1549	In-S	33	21:10:55	No	00:05:40	00:01:00	-74.45	0	Deep-noVL	Night	No
2002-06-30	1549	In-S	34	21:17:28	No	00:05:37	00:00:33	-60.45	0	Deep-noVL	Night	No
2002-06-30	1549	In-S	35	21:23:16	No	00:02:04	00:00:59	-12.86	0	Shallow-noVL	Night	No
2002-06-30	1549	In-S	36	21:26:11	No	00:06:55	00:02:01	-45.89	0	Shallow-noVL	Night	Yes
2002-06-30	1549	In-S	37	21:33:30	No	00:07:33	00:04:59	-40.3	0	Shallow-noVL	Night	No
2002-06-30	1549	In-S	38	21:42:27	No	00:07:41	00:04:10	-41.98	0	Shallow-noVL	Night	Yes
2002-06-30	1549	In-S	39	21:51:29	No	00:08:46	00:06:25	-42.54	0	Shallow-noVL	Night	No
2002-06-30	1549	In-S	40	22:00:36	No	00:02:39	00:01:53	-15.66	0	Shallow-noVL	Night	No
2002-06-30	1549	In-S	41	22:03:39	No	00:03:14	00:02:15	-14.54	0	Shallow-noVL	Night	No
2002-06-30	1549	In-S	42	22:07:23	No	00:04:29	00:03:25	-13.42	0	Shallow-noVL	Night	No
2002-06-30	1549	In-S	43	22:12:33	No	00:04:38	00:03:33	-13.98	0	Shallow-noVL	Night	No
2002-06-30	1549	In-S	44	22:17:34	No	00:09:34	00:00:21	-61.57	0	Deep-noVL	Night	Yes
2002-06-30	1549	In-S	45	22:27:17	No	00:09:10	00:05:55	-72.77	0	Deep-noVL	Night	No
2002-06-30	1549	In-S	46	22:37:37	No	00:05:10	00:04:16	-16.78	0	Shallow-noVL	Night	No
2002-06-30	1549	In-S	47	22:43:32	No	00:06:09	00:05:12	-13.98	0	Shallow-noVL	Night	No
2002-06-30	1549	In-S	48	22:49:42	No	00:11:05	00:09:28	-61.57	0	Deep-noVL	Night	Yes
2002-06-30	1549	In-S	49	23:01:36	No	00:05:40	00:04:02	-19.58	0	Shallow-noVL	Night	No
2002-06-30	1549	In-S	50	23:08:34	No	00:01:32	00:00:51	-22.94	0	Shallow-noVL	Night	No
2002-06-30	1549	In-S	51	23:10:05	No	00:08:34	00:05:50	-65.49	0	Deep-noVL	Night	No
2002-06-30	1549	In-S	52	23:19:58	No	00:04:54	00:03:44	-27.42	0	Shallow-noVL	Night	No
2002-06-30	1549	In-S	53	23:25:08	No	00:08:00	00:06:01	-68.85	0	Deep-noVL	Night	No
2002-06-30	1549	In-S	54	23:33:59	No	00:04:45	00:03:11	-20.14	0	Shallow-noVL	Night	No
2002-06-30	1549	In-S	55	23:39:31	No	00:03:12	00:02:01	-13.42	0	Shallow-noVL	Night	No
2002-06-30	1549	In-S	56	23:43:28	No	00:04:03	00:02:58	-16.22	0	Shallow-noVL	Night	Yes
2002-06-30	1549	In-S	57	23:48:16	No	00:06:39	00:05:07	-16.78	0	Shallow-noVL	Night	No
2002-06-30	1549	In-S	58	23:55:49	No	00:05:18	00:04:02	-15.1	0	Shallow-noVL	Night	No
2002-07-01	1549	In-S	59	0:01:50	No	00:06:23	00:04:40	-22.94	0	Shallow-noVL	Night	No
2002-07-01	1549	In-S	60	0:08:59	No	00:08:10	00:06:36	-16.78	0	Shallow-noVL	Night	Yes
2002-07-01	1549	In-S	61	0:18:01	No	00:07:54	00:06:42	-15.66	0	Shallow-noVL	Night	No
2002-07-01	1549	In-S	62	0:26:52	No	00:08:10	00:06:52	-13.98	0	Shallow-noVL	Night	No
2002-07-01	1549	In-S	63	0:35:56	No	00:09:29	00:07:33	-24.06	0	Shallow-noVL	Night	No
2002-07-01	1549	In-S	64	0:46:00	No	00:03:49	00:02:28	-15.66	0	Shallow-noVL	Night	No
2002-07-01	1549	In-S	65	0:50:16	No	00:08:02	00:06:47	-17.9	0	Shallow-noVL	Night	Yes
2002-07-01	1549	In-S	66	0:58:53	No	00:10:23	00:08:26	-49.25	0	Shallow-noVL	Night	Yes
2002-07-01	1549	In-S	67	1:10:13	No	00:04:51	00:02:34	-20.14	0	Shallow-noVL	Night	No
2002-07-01	1549	In-S	68	1:15:58	No	00:03:00	00:02:10	-12.3	0	Shallow-noVL	Night	No
2002-07-01	1549	In-S	69	1:19:22	No	00:06:26	00:05:21	-16.22	0	Shallow-noVL	Night	No
2002-07-01	1549	In-S	70	1:26:15	No	00:01:59	00:01:18	-10.62	0	Shallow-noVL	Night	No
2002-07-01	1549	In-S	71	1:28:30	No	00:03:49	00:02:42	-13.42	0	Shallow-noVL	Night	No
2002-07-01	1549	In-S	72	1:32:59	No	00:02:50	00:02:06	-15.66	0	Shallow-noVL	Night	No
2002-07-01	1549	In-S	73	1:36:02	No	00:05:02	00:00:33	-62.69	0	Deep-noVL	Night	Yes
2002-07-01	1549	In-S	74	1:41:34	No	00:04:49	00:03:17	-19.58	0	Shallow-noVL	Night	No
2002-07-01	1549	In-S	75	1:46:55	No	00:09:50	00:08:57	-16.22	0	Shallow-noVL	Night	No
2002-07-01	1549	In-S	76	1:57:42	No	00:03:19	00:02:34	-12.86	0	Shallow-noVL	Night	No
2002-07-01	1549	In-S	77	2:01:47	No	00:08:35	00:07:27	-14.54	0	Shallow-noVL	Night	No
2002-07-01	1549	In-S	78	2:10:46	No	00:04:56	00:00:38	-57.65	0	Deep-noVL	Night	Yes
2002-07-01	1549	In-S	79	02:16:17	No	00:04:40	00:03:22	-14.54	0	Shallow-noVL	Night	No
2002-07-01	1549	In-S	80	02:21:44	No	00:03:47	00:02:47	-11.74	0	Shallow-noVL	Night	No
2002-07-01	1549	In-S	81	02:26:13	No	00:08:11	00:07:00	-12.86	0	Shallow-noVL	Night	No
2002-07-01	1549	In-S	82	02:35:23	No	00:06:33	00:05:45	-13.42	0	Shallow-noVL	Night	Yes
2002-07-01	1549	In-S	83	02:43:15	No	00:05:56	00:04:48	-13.42	0	Shallow-noVL	Night	No
2002-07-01	1549	In-S	84	02:49:16	No	00:03:12	00:02:04	-12.3	0	Shallow-noVL	Night	No
2002-07-01	1549	In-S	85	02:53:37	No	00:06:34	00:05:34	-13.98	0	Shallow-noVL	Night	No
2002-07-01	1549	In-S	86	03:00:51	No	00:07:08	00:04:35	-66.05	0	Deep-noVL	Night	Yes
2002-07-01	1549	In-S	87	03:08:27	No	00:04:53	00:03:52	-21.82	0	Shallow-noVL	Night	Yes
2002-07-01	1549	In-S	88	03:13:53	No	00:07:06	00:00:21	-68.85	0	Deep-noVL	Night	No
2002-07-01	1549	In-S	89	03:21:34	No	00:03:36	00:02:12	-16.78	0	Shallow-noVL	Night	No
2002-07-01	1549	In-S	90	03:25:39	No	00:04:54	00:04:00	-11.74	0	Shallow-noVL	Night	No
2002-07-01	1549	In-S	91	03:31:16	No	00:08:48	00:02:10	-61.57	0	Deep-noVL	Night	Yes
2002-07-01	1549	In-S	92	03:40:15	No	00:03:41	00:02:18	-17.34	0	Shallow-noVL	Night	No
2002-07-01	1549	In-S	93	03:44:47	No	00:04:00	00:02:50	-12.3	0	Shallow-noVL	Night	No
2002-07-01	1549	In-S	94	03:49:14	No	00:05:35	00:04:45	-11.18	0	Shallow-noVL	Night	No
2002-07-01	1549	In-S	95	03:55:34	No	00:02:07	00:01:21	-15.1	0	Shallow-noVL	Night	No
2002-07-01	1549	In-S	96	03:57:57	No	00:00:57	00:00:14	-13.42	0	Shallow-noVL	Night	No
2002-07-01	1549	In-S	97	03:59:04	No	00:08:56	00:01:10	-71.09	0	Deep-noVL	Night	Yes
2002-07-01	1549	In-S	98	04:09:16	No	00:04:27	00:03:28	-20.14	0	Shallow-noVL	Night	No
2002-07-01	1549	In-S	99	04:14:05	No	00:07:41	00:03:57	-67.17	0	Deep-noVL	Night	Yes
2002-07-01	1549	In-S	100	04:22:10	No	00:07:09	00:02:18	-54.29	0	Deep-noVL	Night	Yes
2002-07-01	1549	In-S	101	04:29:37	No	00:07:33	00:02:26	-59.89	0	Deep-noVL	Night	Yes
2002-07-01	1549	In-S	102	04:38:25	No	00:08:54	00:06:07	-52.61	2	ShallowLunging	Day	No
2002-07-01	1549	In-S	103	04:48:05	No	00:06:45	00:05:07	-49.25	0	Shallow-noVL	Day	Yes
2002-07-01	1549	In-S	104	04:55:00	No	00:09:58	00:05:40	-77.24	1	ShallowLunging	Day	No
2002-07-01	1549	In-S	105	05:06:46	No	00:11:30	00:08:03	-68.29	1	ShallowLunging	Day	No
2002-07-01	1549	In-S	106	05:19:07	No	00:13:12	00:10:28	-85.64	2	ShallowLunging	Day	No
2002-07-01	1549	In-S	107	05:33:14	No	00:08:00	00:04:08	-103.56	0	Deep-noVL	Day	No
2002-07-01	1549	In-S	108	05:41:24	No	00:07:43	00:04:18	-109.16	2	DeepLunging	Day	No
2002-07-01	1549	In-S	109	05:49:59	No	00:08:35	00:04:22	-134.91	2	DeepLunging	Day	No
2002-07-01	1549	In-S	110	06:00:08	No	00:09:15	00:04:45	-144.43	2	DeepLunging	Day	No
2002-07-01	1549	In-S	111	06:11:00	No	00:10:28	00:04:30	-157.3	2	DeepLunging	Day	No
2002-07-01	1549	In-S	112	06:23:08	No	00:07:41	00:00:57	-123.7	0	Deep-noVL	Day	No
2002-07-01	1549	In-S	113	06:31:51	No	00:07:27	00:03:43	-73.89	0	Deep-noVL	Day	No
2002-07-01	1549	In-S	114	06:39:45	No	00:08:03	00:01:26	-139.39	1	DeepLunging	Day	No
2002-07-01	1549	In-S	115	06:48:39	Yes	00:08:16	00:05:37	-99.08	2	DeepLunging	Day	No

## Sheet: 7-24-03_1117
Date	Deploy Start Time	Location	Dive #	Start Time	Tag Off?	Total Duration	Bottom Time	Max Depth	# Lunges	Dive Classification	TOD	Call Detected?
2003-07-24	1117	Off	1	11:17:08	No	00:01:43	00:00:24	-7.06	0	Shallow-noVL	Day	No
2003-07-24	1117	Off	2	11:20:05	No	00:12:11	00:07:05	-259.02	3	DeepLunging	Day	No
2003-07-24	1117	Off	3	11:35:44	No	00:10:38	00:04:57	-261.51	1	DeepLunging	Day	No
2003-07-24	1117	Off	4	11:48:56	No	00:08:51	00:02:59	-251.36	1	DeepLunging	Day	No
2003-07-24	1117	Off	5	12:00:06	No	00:02:26	00:01:11	-24.22	0	Shallow-noVL	Day	No
2003-07-24	1117	Off	6	12:03:29	No	00:01:01	00:00:20	-10.83	0	Shallow-noVL	Day	No
2003-07-24	1117	Off	7	12:04:29	No	00:11:27	00:05:53	-272.94	2	DeepLunging	Day	No
2003-07-24	1117	Off	8	12:18:39	No	00:01:51	00:00:59	-14.07	0	Shallow-noVL	Day	No
2003-07-24	1117	Off	9	12:21:53	No	00:11:43	00:07:12	-268.45	2	DeepLunging	Day	No
2003-07-24	1117	Off	10	12:36:47	Yes	00:10:16	00:04:37	-265.23	2	DeepLunging	Day	No

## Sheet: 7-24-03_1545
Date	Deploy Start Time	Location	Dive #	Start Time	Tag Off?	Total Duration	Bottom Time	Max Depth	# Lunges	Dive Classification	TOD	Call Detected?
2003-07-24	1545	Off	1	16:02:09	No	00:10:52	00:06:33	-256.88	3	DeepLunging	Day	No
2003-07-24	1545	Off	2	16:16:20	No	00:09:28	00:04:59	-264.62	0	Deep-noVL	Day	No
2003-07-24	1545	Off	3	16:28:27	No	00:11:41	00:06:56	-262.24	4	DeepLunging	Day	No
2003-07-24	1545	Off	4	16:42:24	No	00:01:28	00:00:52	-7.15	0	Shallow-noVL	Day	No
2003-07-24	1545	Off	5	16:45:13	Yes	00:06:42	00:00:18	-168.26	0	Deep-noVL	Day	No

## Sheet: 8-22-03_1548
Date	Deploy Start Time	Location	Dive #	Start Time	Tag Off?	Total Duration	Bottom Time	Max Depth	# Lunges	Dive Classification	TOD	Call Detected?
2003-08-22	1548	Off	1	15:47:57	No	00:01:41	00:00:42	-21.61	0	Shallow-noVL	Day	No
2003-08-22	1548	Off	2	15:49:41	No	00:11:19	00:06:50	-266.56	4	DeepLunging	Day	No
2003-08-22	1548	Off	3	16:02:18	No	00:02:03	00:01:24	-23.12	1	ShallowLunging	Day	No
2003-08-22	1548	Off	4	16:04:47	No	00:12:01	00:08:08	-260.91	0	Deep-noVL	Day	No
2003-08-22	1548	Off	5	16:20:47	Yes	00:14:25	00:04:59	-267.52	0	Deep-noVL	Day	No

## Sheet: 7-20-04_1417
Date	Deploy Start Time	Location	Dive #	Start Time	Tag Off?	Total Duration	Bottom Time	Max Depth	# Lunges	Dive Classification	TOD	Call Detected?
2004-07-20	1417	In-N	1	14:17:40	No	00:07:12	00:03:24	-138.34	2	DeepLunging	Day	No
2004-07-20	1417	In-N	2	14:25:48	No	00:06:57	00:03:39	-150.18	0	Deep-noVL	Day	No
2004-07-20	1417	In-N	3	14:34:36	No	00:09:29	00:06:28	-168.4	3	DeepLunging	Day	No
2004-07-20	1417	In-N	4	14:45:46	Yes	00:12:44	10:46:00	-160.85	3	DeepLunging	Day	No

## Sheet: 7-21-04_1309
Date	Deploy Start Time	Location	Dive #	Start Time	Tag Off?	Total Duration	Bottom Time	Max Depth	# Lunges	Dive Classification	TOD	Call Detected?
2004-07-21	1309	In-N	1	13:09:09	No	00:10:21	00:07:54	-130.44	3	DeepLunging	Day	No
2004-07-21	1309	In-N	2	13:21:38	No	00:13:00	00:09:59	-145.03	5	DeepLunging	Day	No
2004-07-21	1309	In-N	3	13:36:15	No	00:11:45	00:08:59	-103.86	5	DeepLunging	Day	No
2004-07-21	1309	In-N	4	13:50:23	No	00:05:37	00:02:49	-108.13	1	DeepLunging	Day	No
2004-07-21	1309	In-N	5	13:58:05	Yes	00:02:09	00:00:38	-110.81	0	Deep-noVL	Day	No

## Sheet: 8-22-06_1200
Date	Deploy Start Time	Location	Dive #	Start Time	Tag Off?	Total Duration	Bottom Time	Max Depth	# Lunges	Dive Classification	TOD	Call Detected?
2006-08-22	1200	In-S	1	12:00:44	No	00:01:02	00:00:27	-14.42	0	Shallow-noVL	Day	No
2006-08-22	1200	In-S	2	12:02:01	No	00:10:34	00:06:12	-277.89	3	DeepLunging	Day	No
2006-08-22	1200	In-S	3	12:15:39	No	00:11:39	00:07:45	-258.26	4	DeepLunging	Day	No
2006-08-22	1200	In-S	4	12:29:03	No	00:00:48	00:00:23	-16.66	0	Shallow-noVL	Day	No
2006-08-22	1200	In-S	5	12:29:47	No	00:00:31	00:00:11	-10.49	0	Shallow-noVL	Day	No
2006-08-22	1200	In-S	6	12:30:18	No	00:01:52	00:00:23	-46.67	0	Shallow-noVL	Day	No
2006-08-22	1200	In-S	7	12:32:53	No	00:12:49	00:07:49	-280.1	4	DeepLunging	Day	No
2006-08-22	1200	In-S	8	12:49:37	No	00:09:14	00:05:24	-288.82	3	DeepLunging	Day	No
2006-08-22	1200	In-S	9	13:01:45	No	00:11:51	00:07:10	-297.62	3	DeepLunging	Day	No
2006-08-22	1200	In-S	10	13:17:03	No	00:11:22	00:06:43	-252.82	4	DeepLunging	Day	No
2006-08-22	1200	In-S	11	13:31:58	No	00:08:10	00:04:12	-249.17	2	DeepLunging	Day	No
2006-08-22	1200	In-S	12	13:42:28	No	00:11:22	00:07:14	-261.93	3	DeepLunging	Day	No
2006-08-22	1200	In-S	13	13:55:48	No	00:01:21	00:00:31	-35.56	0	Shallow-noVL	Day	No
2006-08-22	1200	In-S	14	13:57:29	No	00:07:28	00:03:12	-238.21	1	DeepLunging	Day	No
2006-08-22	1200	In-S	15	14:07:58	No	00:10:05	00:04:47	-299.05	2	DeepLunging	Day	No
2006-08-22	1200	In-S	16	14:20:59	No	00:10:49	00:06:37	-290.77	3	DeepLunging	Day	No
2006-08-22	1200	In-S	17	14:35:15	No	00:11:53	00:08:08	-274.97	3	DeepLunging	Day	No
2006-08-22	1200	In-S	18	14:50:45	No	00:11:45	00:06:10	-301.89	3	DeepLunging	Day	No
2006-08-22	1200	In-S	19	15:06:23	No	00:09:51	00:05:10	-289.6	1	DeepLunging	Day	No
2006-08-22	1200	In-S	20	15:20:18	No	00:11:18	00:05:33	-272.11	3	DeepLunging	Day	No
2006-08-22	1200	In-S	21	15:34:59	No	00:10:59	00:07:06	-271.98	4	DeepLunging	Day	No
2006-08-22	1200	In-S	22	15:49:40	No	00:12:15	00:08:20	-311.7	3	DeepLunging	Day	No
2006-08-22	1200	In-S	23	16:04:53	No	00:09:04	00:05:42	-253.08	3	DeepLunging	Day	No
2006-08-22	1200	In-S	24	16:17:24	No	00:09:25	00:02:02	-306.68	1	DeepLunging	Day	No
2006-08-22	1200	In-S	25	16:29:56	No	00:09:32	00:02:56	-306.05	1	DeepLunging	Day	No
2006-08-22	1200	In-S	26	16:42:45	No	00:13:11	00:07:29	-289.52	3	DeepLunging	Day	No
2006-08-22	1200	In-S	27	16:59:58	No	00:08:45	00:04:14	-295.38	1	DeepLunging	Day	No
2006-08-22	1200	In-S	28	17:11:27	No	00:10:38	00:04:16	-277.7	3	DeepLunging	Day	No
2006-08-22	1200	In-S	29	17:25:42	No	00:08:12	00:03:26	-243.6	2	DeepLunging	Day	No
2006-08-22	1200	In-S	30	17:36:29	No	00:08:54	00:04:47	-277.11	2	DeepLunging	Day	No
2006-08-22	1200	In-S	31	17:49:24	No	00:09:14	00:03:29	-261.43	2	DeepLunging	Day	No
2006-08-22	1200	In-S	32	18:01:36	No	00:10:55	00:06:43	-250.55	4	DeepLunging	Day	No
2006-08-22	1200	In-S	33	18:15:42	No	00:09:07	00:05:12	-245.5	3	DeepLunging	Day	No
2006-08-22	1200	In-S	34	18:27:49	No	00:10:18	00:06:37	-227.91	4	DeepLunging	Day	No
2006-08-22	1200	In-S	35	18:42:05	Yes	00:09:28	00:01:50	-223.87	1	DeepLunging	Day	No

[truncated: 112 more sheets: 8-23-06_1247, 8-24-06_1530, 8-25-06_1233, 9-06-07_1001, 9-06-07_1024, 9-6-07_1240, 9-6-07_1603, 9-6-07_1645, 9-7-07_0950, 9-7-07_1814, 9-8-07_0907, 9-8-07_0945, 9-8-07_1002, 6-14-08_1017, 8-14-08_1432, 8-16-08_1044, 9-9-08_1338, 9-9-08_1405, 9-10-08_1437, 9-12-08_1417 …]
